# Supplementary material
Source: PubMed Central journal article supplement (PMC3624519)
Supplement: JB.01490-12_zjb999092493so1.pdf [file JB.01490-12_zjb999092493so1.pdf]

# Suppl. Figure 1

A

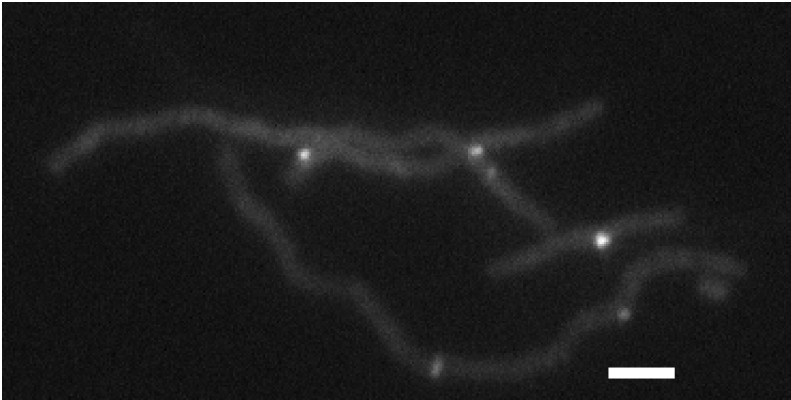

B

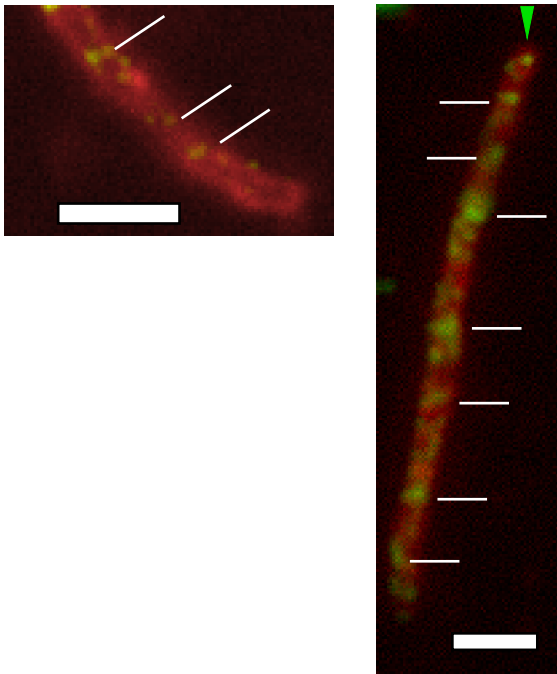

A) Filamenting phenotype of 1061 FtsZ-GFP at 37 °C B) Immunofluorescence images of Aztreonam treated cells with anti *C. glutamicum* FtsZ antiserum. Cell membranes were stained with FM4-64 (red). FtsZ-rings are indicated with white lines, polar foci are marked with an arrow. Scaling bars in all images are 2  $\mu$ m.
